# Supplementary material for: Different Mutations in a P-type ATPase Transporter in Leishmania Parasites are Associated with Cross-resistance to Two Leading Drugs by Distinct Mechanisms
Source: PubMed Central journal article supplement (PMC5135041; doi:10.1371/journal.pntd.0005171), 2016-12-02
Supplement: pntd.0005171.s009.pdf [file pntd.0005171.s009.pdf]

**Supplementary Table S1.** Estimated ploidy for Ldi263AmB1000.1 and its WT parent (Ldi263WT).

| Chr     | Ldi263WT    |                 | Ldi263AMB1000.1 |                 |
|---------|-------------|-----------------|-----------------|-----------------|
|         | Median FPKM | Ploidy Estimate | Median FPKM     | Ploidy Estimate |
| LinJ.01 | 26.5366     | 2               | 29.3728         | 2               |
| LinJ.02 | 27.35685    | 2               | 29.54255        | 2               |
| LinJ.03 | 26.77355    | 2               | 29.08575        | 2               |
| LinJ.04 | 27.3013     | 2               | 29.5662         | 2               |
| LinJ.05 | 28.1074     | 2               | 42.7873         | 3               |
| LinJ.06 | 28.0202     | 2               | 29.7669         | 2               |
| LinJ.07 | 26.3567     | 2               | 28.352          | 2               |
| LinJ.08 | 26.52965    | 2               | 29.29835        | 2               |
| LinJ.09 | 32.9111     | 2               | 29.34605        | 2               |
| LinJ.10 | 27.037      | 2               | 29.8045         | 2               |
| LinJ.11 | 27.1969     | 2               | 29.1277         | 2               |
| LinJ.12 | 53.3895     | 4               | 28.8899         | 2               |
| LinJ.13 | 39.3248     | 3               | 42.1333         | 3               |
| LinJ.14 | 26.40235    | 2               | 28.21675        | 2               |
| LinJ.15 | 26.61885    | 2               | 28.25005        | 2               |
| LinJ.16 | 26.7811     | 2               | 13.8955         | 1               |
| LinJ.17 | 26.6867     | 2               | 28.2293         | 2               |
| LinJ.18 | 26.6362     | 2               | 27.4423         | 2               |
| LinJ.19 | 26.6425     | 2               | 27.83285        | 2               |
| LinJ.20 | 26.2234     | 2               | 27.2882         | 2               |
| LinJ.21 | 26.61365    | 2               | 35.4369         | 3               |
| LinJ.22 | 26.6853     | 2               | 28.062          | 2               |
| LinJ.23 | 27.0422     | 2               | 36.7171         | 3               |
| LinJ.24 | 26.2478     | 2               | 27.5238         | 2               |
| LinJ.25 | 26.4474     | 2               | 27.92435        | 2               |
| LinJ.26 | 27.2747     | 2               | 27.8175         | 2               |
| LinJ.27 | 25.838      | 2               | 28.22375        | 2               |
| LinJ.28 | 26.1999     | 2               | 28.3328         | 2               |
| LinJ.29 | 26.0999     | 2               | 27.6516         | 2               |
| LinJ.30 | 25.92495    | 2               | 28.1439         | 2               |
| LinJ.31 | 63.6798     | 5               | 54.7806         | 4               |
| LinJ.32 | 38.81885    | 3               | 41.50375        | 3               |
| LinJ.33 | 25.84645    | 2               | 27.2527         | 2               |
| LinJ.34 | 25.79285    | 2               | 27.9632         | 2               |
| LinJ.35 | 25.8012     | 2               | 27.8109         | 2               |
| LinJ.36 | 25.3979     | 2               | 27.4582         | 2               |

Median median FPKM Ldi263AMB1000.1 = 28.3328

Median median FPKM Ldi263WT = 26.6425
