# Supplementary material for: Different Mutations in a P-type ATPase Transporter in Leishmania Parasites are Associated with Cross-resistance to Two Leading Drugs by Distinct Mechanisms
Source: PubMed Central journal article supplement (PMC5135041; doi:10.1371/journal.pntd.0005171), 2016-12-02
Supplement: pntd.0005171.s012.pdf [file pntd.0005171.s012.pdf]

# SI Datasets

## Dataset S1: InDels

| GeneID       | Pos in gene | Xsome   | Pos in xsome | Seq in ref | Seq in Amb1000.1 | Qual   | Gene annotation                              |
|--------------|-------------|---------|--------------|------------|------------------|--------|----------------------------------------------|
| LinJ.04.0800 | 102         | LinJ.04 | 310482       | A          | AG               | 96.73  | hypothetical protein conserved               |
| LinJ.10.0521 | 67          | LinJ.10 | 220111       | CG         | C                | 232.74 | hypothetical protein unknown function        |
| LinJ.21.1780 | 4173        | LinJ.21 | 621120       | CCCGCTCGT  | C                | 658.73 | hypothetical protein conserved               |
| LinJ.35.0370 | 567         | LinJ.35 | 94402        | G          | GT               | 211.73 | ATP-dependent DEAD-box RNA helicase putative |
