# Supplementary material for: Different Mutations in a P-type ATPase Transporter in Leishmania Parasites are Associated with Cross-resistance to Two Leading Drugs by Distinct Mechanisms
Source: PubMed Central journal article supplement (PMC5135041; doi:10.1371/journal.pntd.0005171), 2016-12-02
Supplement: pntd.0005171.s013.pdf [file pntd.0005171.s013.pdf]

## Dataset S2: AmB\_SNPs-InCDS-NoSyn-Homozygous

| GeneID       | Pos in Gene | Xsome   | Pos on xsome | Nt in ref | Nt in Amb1000.1 | Qual   | Codon in ref | Codon in Amb1000.1 | AA in ref | AA in Amb1000.1 | Gene annotation                                 |
|--------------|-------------|---------|--------------|-----------|-----------------|--------|--------------|--------------------|-----------|-----------------|-------------------------------------------------|
| LinJ.13.1590 | 1297        | LinJ.13 | 619316       | C         | T               | 661.77 | GGC          | AGC                | G         | S               | phospholipid-transporting ATPase 1-like protein |
| LinJ.16.1240 | 2476        | LinJ.16 | 465851       | G         | C               | 206.84 | CAG          | GAG                | Q         | E               | hypothetical protein conserved                  |
| LinJ.35.0520 | 5302        | LinJ.35 | 211854       | G         | A               | 40.74  | GCC          | ACC                | A         | T               | proteophosphoglycan ppg4                        |
