# Supplementary material for: Opening of Auchroisk Distillery. Speech [on Britain in the EC] by the Rt. Hon. George Thomson, [EEC Commissioner for regional policy]. Speyside, Scotland, 19 July 1974
Source: PLOS journal article supplement (doi:10.1371/journal.pntd.0005171), 1974-01-01
Supplement: S10 (10.1371/journal.pntd.0005171.s010) [file journal.pntd.0005171.s010]

## Table S2

SNPs deduced from the sequencing of LdiAmB1000.1 and absent from the sequencing of its Ldi263WT parent.

| SNP type            | Total <sup>1</sup> | In CDS <sup>1,2</sup> | In CDS non-synonymous <sup>1,2</sup> |
|---------------------|--------------------|-----------------------|--------------------------------------|
| <b>Homozygous</b>   | 18                 | 3                     | 3                                    |
| <b>Heterozygous</b> | 470                | 123                   | 85                                   |
| <b>Total</b>        | 488                | 126                   | 88                                   |

<sup>1</sup> Number of SNPs with  $\leq 0.1\%$  wrong call rates (phred scale quality value of  $\geq 30$ ).

<sup>2</sup> CDS, Coding sequence
